# Supplementary material for: Phylogenetic Diversity of Ossification Patterns in the Avian Vertebral Column: A Review and New Data from the Domestic Pigeon and Two Species of Grebes
Source: MDPI journal article supplement (doi:10.3390/biology11020180), 2022-01-24
Supplement: s1 [file s1]

**Table S1.** Estimated divergence dates for given clades of the avian phylogenetic tree for the temporally-calibrated ancestral state reconstructions.

| Clade                                 | Divergence date | Source           |
|---------------------------------------|-----------------|------------------|
| <i>Eudromia</i> + <i>Dromaius</i>     | 45              | Kuhl et al. [38] |
| <i>Apteryx</i> + <i>Dromaius</i>      | 50              | Kuhl et al. [38] |
| <i>Rhea</i> + <i>Dromaius</i>         | 51              | Kuhl et al. [38] |
| <i>Struthio</i> + <i>Dromaius</i>     | 58              | Kuhl et al. [38] |
| <i>Coturnix</i> + <i>Synoicus</i>     | 18              | TimeTree [40]    |
| <i>Coturnix</i> + <i>Gallus</i>       | 20              | Prum et al. [37] |
| <i>Gallus</i> + <i>Meleagris</i>      | 32              | TimeTree [40]    |
| <i>Anas</i> + <i>Somateria</i>        | 20              | TimeTree [40]    |
| <i>Anas</i> + <i>Cairina</i>          | 23              | TimeTree [40]    |
| <i>Larus</i> + <i>Chroicocephalus</i> | 6               | TimeTree [40]    |
| <i>Larus</i> + <i>Sterna</i>          | 16              | Kuhl et al. [38] |
| <i>Larus</i> + <i>Stercorarius</i>    | 22              | Kuhl et al. [38] |
| <i>Corvus</i> + <i>Taeniopygia</i>    | 34              | Kuhl et al. [38] |
| <i>Corvus</i> + <i>Myiopsitta</i>     | 62              | Kuhl et al. [38] |
| Neoaves                               | 69              | Kuhl et al. [38] |
| Galloanserae                          | 63              | Kuhl et al. [38] |
| Neognathae                            | 81              | Kuhl et al. [38] |
| Neornithes                            | 94              | Kuhl et al. [38] |
