# Supplementary material for: Phylogenetic Diversity of Ossification Patterns in the Avian Vertebral Column: A Review and New Data from the Domestic Pigeon and Two Species of Grebes
Source: MDPI journal article supplement (doi:10.3390/biology11020180), 2022-01-24
Supplement: s1 [file s1]

**Table S2.** Results of ancestral state reconstructions for major avian clades, represented by at least three species in our dataset. The values reported in brackets in maximum likelihood analyses are proportional likelihoods. Abbreviations: CL – cervical locus, TL – thoracic locus.

| Clade                                 | Maximum parsimony            | Maximum likelihood<br>(equal length branches)                  | Maximum likelihood (time-<br>calibrated branch lengths)        |
|---------------------------------------|------------------------------|----------------------------------------------------------------|----------------------------------------------------------------|
| Neornithes                            | CL: present<br>TL: present   | CL: present (1)<br>TL: likely present (0.906)                  | CL: present (1)<br>TL: likely present (0.788)                  |
| Palaeognathae                         | CL: present<br>TL: present   | CL: present (1)<br>TL: likely present (0.981)                  | CL: present (1)<br>TL: likely present (0.950)                  |
| Neognathae                            | CL: present<br>TL: present   | CL: present (1)<br>TL: likely present (0.872)                  | CL: present (1)<br>TL: likely present (0.760)                  |
| Galloanserae                          | CL: present<br>TL: ambiguous | CL: present (1)<br>TL: ambiguous but likely<br>present (0.558) | CL: present (1)<br>TL: likely present (0.666)                  |
| Galliformes                           | CL: present<br>TL: ambiguous | CL: present (1)<br>TL: ambiguous but likely<br>present (0.523) | CL: present (1)<br>TL: likely present (0.732)                  |
| <i>Gallus + Coturnix</i>              | CL: present<br>TL: present   | CL: present (1)<br>TL: likely present (0.924)                  | CL: present (1)<br>TL: likely present (0.983)                  |
| Anseriformes                          | CL: present<br>TL: absent    | CL: present (1)<br>TL: likely absent (0.710)                   | CL: present (1)<br>TL: likely absent (0.732)                   |
| Neoaves                               | CL: present<br>TL: present   | CL: present (1)<br>TL: likely present (0.979)                  | CL: present (1)<br>TL: likely present (0.759)                  |
| Charadriiformes +<br>Psittacopasserae | CL: present<br>TL: present   | CL: present (1)<br>TL: likely present (0.849)                  | CL: present (1)<br>TL: likely present (0.748)                  |
| Charadriiformes                       | CL: present<br>TL: present   | CL: present (1)<br>TL: likely present (0.972)                  | CL: present (1)<br>TL: likely present (0.989)                  |
| Psittacopasserae                      | CL: present<br>TL: absent    | CL: present (1)<br>TL: likely absent (0.869)                   | CL: present (1)<br>TL: ambiguous but likely<br>present (0.560) |
